# Supplementary material
Source: PubMed Central journal article supplement (PMC2887062)
Supplement: mcq024_1.pdf [file mcq024_1.pdf]

## SUPPLEMENTARY DATA

TABLE S1. Grain protein (GPC, %) and mineral nutrient concentrations (mg kg<sup>-1</sup>) of wild emmer wheat accessions and domesticated wheat cultivars. Values are means of five or six replicas, for 2007 and 2008 experiments, respectively.

| Genotype and collection site |                     | GPC  |      | Zn   |      | Fe   |      | Cu   |      | Mn   |      | Ca   |      | Mg   |      | K    |      | P    |      | S    |      |
|------------------------------|---------------------|------|------|------|------|------|------|------|------|------|------|------|------|------|------|------|------|------|------|------|------|
|                              |                     | 2007 | 2008 | 2007 | 2008 | 2007 | 2008 | 2007 | 2008 | 2007 | 2008 | 2007 | 2008 | 2007 | 2008 | 2007 | 2008 | 2007 | 2008 | 2007 | 2008 |
| Wild emmer wheat accessions  |                     |      |      |      |      |      |      |      |      |      |      |      |      |      |      |      |      |      |      |      |      |
| Jordan                       |                     |      |      |      |      |      |      |      |      |      |      |      |      |      |      |      |      |      |      |      |      |
| dico 142                     | Amman               | 20.5 | 22.0 | 55.1 | 45.5 | 18.2 | 38.8 | 5.8  | 3.7  | 23.1 | 30.7 | 411  | 396  | 1782 | 1649 | 5070 | 4807 | 5517 | 5653 | 2169 | 2158 |
| dico 137                     | Balqa               | 20.0 | 24.2 | 61.8 | 38.3 | 22.3 | 46.8 | 7.2  | 3.8  | 34.7 | 32.2 | 364  | 348  | 1841 | 1775 | 5713 | 5230 | 5694 | 5763 | 2109 | 2236 |
| dico 141                     | Balqa               | 21.0 | 23.2 | 61.1 | 38.5 | 21.1 | 46.3 | 7.7  | 4.2  | 27.1 | 29.5 | 402  | 421  | 1794 | 1804 | 5891 | 5400 | 5371 | 6089 | 2285 | 2582 |
| dico 133                     | Irbid               | 20.9 |      | 77.7 |      | 23.7 |      |      |      | 11.6 |      |      |      | 377  |      | 1994 |      | 5250 |      | 5896 | 2280 |
| dico 140                     | Irbid               | 21.5 |      | 83.3 |      | 28.7 |      |      |      | 12.6 |      |      |      | 461  |      | 1897 |      | 5252 |      | 5879 | 2306 |
| J 10                         | Sakhra              | 20.8 |      | 84.5 |      | 23.2 |      |      |      | 10.7 |      |      |      | 432  |      | 1978 |      | 5604 |      | 6065 | 2276 |
| J 21                         | Sakhra              | 23.6 | 24.4 | 82.2 | 53.3 | 30.9 | 53.8 | 9.5  | 5.2  | 36.0 | 40.0 | 400  | 405  | 2202 | 1998 | 5883 | 5467 | 6693 | 6332 | 2603 | 2325 |
| J 29                         | Sakhra              | 22.3 |      | 87.9 |      | 22.5 |      |      |      | 9.5  |      |      |      | 374  |      | 2127 |      | 5787 |      | 6232 | 2459 |
| J 28                         | Sakhra              | 22.3 | 23.5 | 90.1 | 66.8 | 23.7 | 53.0 | 10.1 | 5.6  | 41.6 | 47.8 | 450  | 421  | 2113 | 2117 | 5932 | 5414 | 6236 | 6634 | 2608 | 2766 |
| J 30                         | Sakhra              | 22.4 |      | 89.5 |      | 24.3 |      |      |      | 9.5  |      |      |      | 377  |      | 2086 |      | 5618 |      | 6271 | 2544 |
| dico 139                     | Um el Amad          | 24.1 |      | 82.9 |      | 23.6 |      |      |      | 9.4  |      |      |      | 487  |      | 1916 |      | 5546 |      | 5936 | 2788 |
| Israel                       |                     |      |      |      |      |      |      |      |      |      |      |      |      |      |      |      |      |      |      |      |      |
| 31-1                         | Kabara, Mt. Carmel  | 22.9 |      | 75.3 |      | 30.2 |      |      |      | 7.9  |      |      |      | 389  |      | 1830 |      | 5077 |      | 5169 | 2178 |
| dico 64                      | Afula-Tiberias road | 20.8 | 23.6 | 92.6 | 63.8 | 26.6 | 51.4 | 6.6  | 3.8  | 52.0 | 46.8 | 592  | 452  | 2020 | 1829 | 5744 | 5393 | 6145 | 6211 | 2395 | 2431 |
| dico 46                      | Almagor             | 21.4 |      | 89.7 |      | 29.5 |      |      |      | 11.4 |      |      |      | 418  |      | 1801 |      | 5320 |      | 5531 | 2148 |
| dico 65                      | Almagor             | 20.4 |      | 85.0 |      | 29.0 |      |      |      | 10.1 |      |      |      | 417  |      | 1793 |      | 5000 |      | 5069 | 2103 |
| 24-39                        | Amirim              | 21.7 | 29.3 | 94.0 | 60.0 | 37.5 | 55.6 | 9.6  | 4.0  | 43.9 | 38.6 | 485  | 416  | 2071 | 2034 | 5622 | 5265 | 5811 | 6209 | 2353 | 2585 |
| dico 79                      | Bet Meir            | 20.2 |      | 77.1 |      | 22.7 |      |      |      | 7.8  |      |      |      | 458  |      | 1854 |      | 5461 |      | 5469 | 2296 |
| dico 47                      | Bet Qeset           | 22.4 | 24.2 | 94.0 | 66.0 | 27.9 | 36.5 | 8.8  | 4.6  | 45.2 | 41.5 | 462  | 415  | 1872 | 1833 | 5455 | 5572 | 5891 | 6152 | 2421 | 2317 |
| Bem 1/1                      | Burj el Maliech     | 21.0 |      | 74.0 |      | 26.3 |      |      |      | 9.1  |      |      |      | 377  |      | 1776 |      | 5218 |      | 5650 | 2411 |
| Bem 1/3                      | Burj el Maliech     | 22.2 |      | 76.4 |      | 27.9 |      |      |      | 10.0 |      |      |      | 518  |      | 1920 |      | 5592 |      | 5922 | 2690 |
| BR 1/1                       | Camp Brosh          | 22.3 |      | 74.5 |      | 30.1 |      |      |      | 9.6  |      |      |      | 374  |      | 1907 |      | 5091 |      | 5782 | 2341 |

| Genotype and collection site |                         | GPC  |      | Zn   |      | Fe   |      | Cu   |      | Mn   |      | Ca   |      | Mg   |      | K    |      | P    |      | S    |      |
|------------------------------|-------------------------|------|------|------|------|------|------|------|------|------|------|------|------|------|------|------|------|------|------|------|------|
|                              |                         | 2007 | 2008 | 2007 | 2008 | 2007 | 2008 | 2007 | 2008 | 2007 | 2008 | 2007 | 2008 | 2007 | 2008 | 2007 | 2008 | 2007 | 2008 | 2007 | 2008 |
| BR 1/2                       | Camp Brosh              | 22.2 |      | 76.3 |      | 28.2 |      | 9.9  |      | 40.7 |      | 356  |      | 1927 |      | 5476 |      | 5807 |      | 2321 |      |
| dico 116                     | En Hashofet-Daliya road | 21.2 |      | 78.6 |      | 28.0 |      | 8.6  |      | 47.2 |      | 444  |      | 1889 |      | 5247 |      | 5710 |      | 2184 |      |
| 8-28                         | Gamla                   | 20.5 |      | 68.1 |      | 21.8 |      | 7.4  |      | 43.9 |      | 408  |      | 1738 |      | 4797 |      | 4934 |      | 2045 |      |
| G18-16                       | Gitit                   |      | 19.8 |      | 39.8 |      | 42.4 |      | 4.6  |      | 27.4 |      | 419  |      | 1668 |      | 4647 |      | 5222 |      | 1992 |
| 18-27                        | Gitit                   | 20.2 | 24.2 | 77.8 | 47.0 | 32.2 | 54.2 | 7.1  | 3.9  | 43.1 | 38.8 | 560  | 458  | 1812 | 1858 | 5333 | 4650 | 5644 | 6025 | 2317 | 2530 |
| 18-39                        | Gitit                   | 22.4 | 23.4 | 90.7 | 49.6 | 29.6 | 44.4 | 11.4 | 5.6  | 47.2 | 37.8 | 546  | 462  | 1964 | 1897 | 5701 | 4976 | 6227 | 6110 | 2401 | 2300 |
| 19-1                         | Kokhav Hashahar         | 21.4 |      | 71.9 |      | 28.6 |      | 9.6  |      | 49.5 |      | 393  |      | 1816 |      | 5689 |      | 5944 |      | 2273 |      |
| 19-36                        | Kokhav Hashahar         | 22.6 |      | 79.5 |      | 28.6 |      | 9.6  |      | 38.1 |      | 451  |      | 1920 |      | 5266 |      | 5920 |      | 2353 |      |
| KH 1/3                       | Kokhav Hayarden         | 23.6 |      | 78.8 |      | 30.2 |      | 6.0  |      | 34.4 |      | 445  |      | 1990 |      | 5691 |      | 6043 |      | 2271 |      |
| KH 2/3                       | Kokhav Hayarden         | 18.9 | 22.8 | 71.8 | 49.3 | 23.9 | 39.3 | 5.6  | 2.8  | 33.6 | 27.7 | 303  | 315  | 1828 | 1776 | 5712 | 5437 | 5551 | 5675 | 2004 | 2175 |
| ME 2/1                       | Ma'ale Efraim           | 21.4 |      | 74.6 |      | 22.2 |      | 9.9  |      | 37.7 |      | 459  |      | 1974 |      | 5773 |      | 5738 |      | 2399 |      |
| ME 2/2                       | Ma'ale Efraim           | 20.6 |      | 74.6 |      | 26.5 |      | 8.5  |      | 39.5 |      | 439  |      | 1871 |      | 5900 |      | 5693 |      | 2325 |      |
| MM 4/3                       | Ma'ale Merav            | 21.4 |      | 87.8 |      | 31.7 |      | 9.8  |      | 37.5 |      | 459  |      | 1906 |      | 5442 |      | 6062 |      | 2269 |      |
| dico 80                      | Mt. Dov                 | 23.9 |      | 84.2 |      | 21.9 |      | 8.6  |      | 34.2 |      | 350  |      | 2171 |      | 5232 |      | 6283 |      | 2389 |      |
| dico 100                     | Ramla junction          | 21.2 |      | 70.2 |      | 21.0 |      | 9.1  |      | 36.8 |      | 446  |      | 1874 |      | 6441 |      | 6128 |      | 2095 |      |
| dico 53                      | Safad road              | 21.3 |      | 82.6 |      | 26.4 |      | 8.7  |      | 35.6 |      | 389  |      | 1875 |      | 5185 |      | 5730 |      | 2147 |      |
| dico 84                      | Sanhedriya              | 21.0 |      | 77.9 |      | 19.1 |      | 8.2  |      | 30.7 |      | 481  |      | 1939 |      | 5887 |      | 5568 |      | 2301 |      |
| dico 114                     | Rosh Pinna              | 22.0 |      | 79.9 |      | 18.2 |      | 9.8  |      | 50.2 |      | 564  |      | 1944 |      | 5135 |      | 5730 |      | 2375 |      |
| dico 52                      | West Jerusalem          | 18.1 | 19.8 | 60.7 | 37.0 | 19.5 | 43.4 | 6.2  | 3.9  | 21.0 | 22.4 | 446  | 463  | 1870 | 1828 | 4683 | 4822 | 5450 | 5749 | 2024 | 2109 |
| Lebanon                      |                         |      |      |      |      |      |      |      |      |      |      |      |      |      |      |      |      |      |      |      |      |
| dico 71                      | Aiha-Kfarkouk road      | 21.1 | 23.1 | 88.9 | 56.8 | 26.8 | 45.8 | 9.8  | 4.7  | 38.1 | 31.0 | 424  | 395  | 2068 | 1836 | 5471 | 5520 | 6209 | 6245 | 2378 | 2245 |
| dico 70                      | Rashaya                 | 20.4 |      | 77.1 |      | 18.1 |      | 10.5 |      | 27.7 |      | 405  |      | 1883 |      | 5995 |      | 5762 |      | 2136 |      |
| dico 101                     | Rashaya                 | 19.2 |      | 75.0 |      | 19.7 |      | 8.9  |      | 27.2 |      | 424  |      | 1852 |      | 5938 |      | 5769 |      | 2158 |      |
| dico 117                     | Rashaya                 | 19.9 |      | 74.0 |      | 20.7 |      | 9.9  |      | 26.3 |      | 379  |      | 1847 |      | 5573 |      | 5817 |      | 2108 |      |
| dico 74                      | Rashaya-Aiha road       | 19.1 |      | 75.8 |      | 24.7 |      | 10.6 |      | 30.7 |      | 326  |      | 1818 |      | 5097 |      | 5631 |      | 2107 |      |
| Syria                        |                         |      |      |      |      |      |      |      |      |      |      |      |      |      |      |      |      |      |      |      |      |
| dico 134                     | Idlib                   | 18.6 |      | 61.6 |      | 24.0 |      | 8.3  |      | 35.1 |      | 386  |      | 1770 |      | 5183 |      | 5266 |      | 2055 |      |
| dico 131                     | Zabadani                | 23.6 | 23.7 | 88.9 | 66.3 | 29.9 | 44.3 | 8.4  | 4.9  | 49.7 | 40.0 | 460  | 426  | 1923 | 1802 | 5195 | 5349 | 6466 | 6309 | 2908 | 2861 |
| dico 145                     | Birein                  | 19.4 |      | 70.7 |      | 21.1 |      | 11.9 |      | 33.0 |      | 460  |      | 1833 |      | 5431 |      | 6027 |      | 2099 |      |
| dico 88                      | Dera province           | 18.1 | 19.2 | 80.3 | 62.0 | 21.8 | 46.3 | 9.9  | 5.1  | 40.5 | 36.7 | 591  | 566  | 1824 | 1801 | 5153 | 4838 | 5437 | 5792 | 2027 | 2144 |
| dico 127                     | Dar'a Nawa              | 20.2 |      | 79.1 |      | 30.2 |      | 10.1 |      | 42.8 |      | 405  |      | 1779 |      | 5047 |      | 5393 |      | 2024 |      |

| Genotype and collection site |                     | GPC  |      | Zn   |      | Fe   |      | Cu   |      | Mn   |      | Ca   |      | Mg   |      | K    |      | P    |      | S    |      |
|------------------------------|---------------------|------|------|------|------|------|------|------|------|------|------|------|------|------|------|------|------|------|------|------|------|
|                              |                     | 2007 | 2008 | 2007 | 2008 | 2007 | 2008 | 2007 | 2008 | 2007 | 2008 | 2007 | 2008 | 2007 | 2008 | 2007 | 2008 | 2007 | 2008 | 2007 | 2008 |
| dico 125                     | Rawda               | 20.6 |      | 66.4 |      | 21.2 |      | 9.3  |      | 30.9 |      | 419  |      | 1866 |      | 5413 |      | 5973 |      | 2426 |      |
| 1082                         | Sweida              | 20.4 | 20.6 | 87.1 | 50.2 | 28.9 | 52.2 | 9.3  | 5.6  | 34.7 | 38.0 | 382  | 334  | 1675 | 1597 | 5503 | 5125 | 5554 | 5699 | 2073 | 2044 |
| dico 126                     | Sweida              |      | 19.9 |      | 44.6 |      | 42.0 |      | 4.8  |      | 26.2 |      | 370  |      | 1651 |      | 4780 |      | 5585 |      | 2033 |
| dico 129                     | Sweida              | 23.6 |      | 73.3 |      | 18.6 |      | 8.7  |      | 30.4 |      | 393  |      | 2069 |      | 5065 |      | 6142 |      | 2479 |      |
| Turkey                       |                     |      |      |      |      |      |      |      |      |      |      |      |      |      |      |      |      |      |      |      |      |
| 35-8                         | East Siverek        | 21.7 |      | 72.8 |      | 26.6 |      | 10.0 |      | 36.1 |      | 349  |      | 1802 |      | 5302 |      | 5893 |      | 2359 |      |
| dico 118                     | Gaziantep           | 23.7 |      | 75.9 |      | 23.8 |      | 10.4 |      | 40.1 |      | 464  |      | 2108 |      | 5501 |      | 6363 |      | 2271 |      |
| dico 119                     | Gaziantep           | 19.4 |      | 73.4 |      | 21.7 |      | 8.6  |      | 32.9 |      | 562  |      | 1938 |      | 5842 |      | 5835 |      | 2318 |      |
| dico 107                     | Mt.Karakadag        | 23.0 |      | 80.4 |      | 20.9 |      | 10.4 |      | 41.9 |      | 449  |      | 1981 |      | 5211 |      | 6004 |      | 2414 |      |
| dico 109                     | Mt.Karakadag        | 22.2 |      | 78.4 |      | 21.7 |      | 9.6  |      | 42.4 |      | 469  |      | 1945 |      | 5432 |      | 6050 |      | 2405 |      |
| dico 110                     | Mt.Karakadag        | 21.6 | 20.4 | 67.9 | 59.0 | 18.1 | 46.0 | 10.0 | 5.7  | 16.5 | 23.3 | 404  | 384  | 1800 | 1746 | 5333 | 5117 | 5569 | 5711 | 2177 | 2297 |
| dico 113                     | West of Diyarbakir  | 25.9 | 25.6 | 88.8 | 66.3 | 36.2 | 50.3 | 10.3 | 6.1  | 45.2 | 35.3 | 481  | 431  | 2131 | 1972 | 5445 | 5481 | 6526 | 6404 | 2846 | 2749 |
| dico 55                      | West of Diyarbakir  | 25.6 | 26.4 | 83.7 | 62.7 | 30.6 | 53.3 | 9.7  | 6.0  | 43.1 | 39.5 | 480  | 462  | 2086 | 1899 | 5647 | 5328 | 6349 | 6303 | 2775 | 2710 |
| dico 56                      | West of Diyarbakir  | 20.4 |      | 69.1 |      | 18.3 |      | 9.2  |      | 32.5 |      | 435  |      | 1804 |      | 5405 |      | 5666 |      | 2400 |      |
| dico 57                      | West of Diyarbakir  | 21.8 |      | 72.6 |      | 24.8 |      | 9.6  |      | 40.8 |      | 358  |      | 1858 |      | 5222 |      | 5816 |      | 2244 |      |
| dico 59                      | West of Diyarbakir  | 24.9 | 23.9 | 70.4 | 50.0 | 23.2 | 44.5 | 9.9  | 4.0  | 37.7 | 33.5 | 376  | 306  | 2075 | 1751 | 5597 | 5247 | 6299 | 5660 | 2521 | 2281 |
| dico 60                      | West of Diyarbakir  | 23.0 |      | 85.2 |      | 25.3 |      | 11.3 |      | 42.1 |      | 358  |      | 2147 |      | 5180 |      | 6448 |      | 2498 |      |
| dico 61                      | West of Diyarbakir  | 21.8 |      | 72.4 |      | 21.9 |      | 10.8 |      | 46.3 |      | 416  |      | 1964 |      | 5125 |      | 5755 |      | 2374 |      |
| dico 63                      | West of Diyarbakir  | 21.7 |      | 70.9 |      | 28.8 |      | 9.0  |      | 34.6 |      | 397  |      | 1899 |      | 5162 |      | 6232 |      | 2426 |      |
| dico 89                      | West of Diyarbakir  | 27.0 | 25.7 | 85.5 | 68.3 | 34.4 | 50.2 | 10.2 | 5.8  | 44.5 | 32.3 | 479  | 462  | 2101 | 1909 | 5581 | 5605 | 6489 | 6312 | 2828 | 2720 |
| dico 90                      | West of Diyarbakir  | 22.7 | 23.2 | 90.3 | 54.5 | 29.5 | 47.2 | 10.8 | 5.0  | 54.2 | 40.2 | 513  | 398  | 2050 | 1867 | 5544 | 5160 | 6237 | 6113 | 2487 | 2377 |
| dico 91                      | West of Diyarbakir  | 23.8 |      | 81.4 |      | 22.5 |      | 11.3 |      | 36.6 |      | 377  |      | 2063 |      | 5490 |      | 6475 |      | 2506 |      |
| dico 92                      | West of Diyarbakir  | 23.3 |      | 83.8 |      | 29.7 |      | 9.8  |      | 46.0 |      | 408  |      | 1961 |      | 5157 |      | 6077 |      | 2358 |      |
| dico 93                      | West of Diyarbakir  | 21.5 |      | 76.3 |      | 21.7 |      | 11.1 |      | 30.8 |      | 350  |      | 1973 |      | 5690 |      | 6256 |      | 2316 |      |
| dico 94                      | West of Diyarbakir  | 25.3 | 25.1 | 78.7 | 53.7 | 22.2 | 47.0 | 10.2 | 5.9  | 38.9 | 34.0 | 370  | 342  | 2107 | 1878 | 5597 | 5071 | 6255 | 5943 | 2636 | 2449 |
| N 33                         | West of Diyarbakir  | 23.3 | 23.5 | 86.7 | 57.0 | 26.8 | 44.8 | 10.1 | 5.2  | 50.3 | 37.8 | 425  | 380  | 1993 | 1808 | 5819 | 5144 | 6081 | 5864 | 2473 | 2281 |
| Iran                         |                     |      |      |      |      |      |      |      |      |      |      |      |      |      |      |      |      |      |      |      |      |
| dico 196                     | Bakhtaran           | 21.3 | 21.2 | 53.2 | 42.0 | 20.4 | 42.2 | 7.6  | 4.3  | 30.3 | 28.6 | 405  | 344  | 1687 | 1584 | 5520 | 5198 | 5441 | 5727 | 2216 | 2248 |
| 8941                         | North to Kermanshah | 20.3 | 20.5 | 84.6 | 68.6 | 30.1 | 53.6 | 8.2  | 4.8  | 31.3 | 26.8 | 391  | 335  | 1627 | 1580 | 5197 | 4777 | 5269 | 5416 | 1920 | 2164 |
| 8943                         | North to Kermanshah | 22.6 |      | 72.8 |      | 24.5 |      | 8.7  |      | 41.0 |      | 419  |      | 1944 |      | 5433 |      | 5645 |      | 2346 |      |
| Iraq                         |                     |      |      |      |      |      |      |      |      |      |      |      |      |      |      |      |      |      |      |      |      |

| Genotype and collection site         |                          | GPC  |      | Zn    |      | Fe   |      | Cu   |      | Mn   |      | Ca   |      | Mg   |      | K    |      | P    |      | S    |      |
|--------------------------------------|--------------------------|------|------|-------|------|------|------|------|------|------|------|------|------|------|------|------|------|------|------|------|------|
|                                      |                          | 2007 | 2008 | 2007  | 2008 | 2007 | 2008 | 2007 | 2008 | 2007 | 2008 | 2007 | 2008 | 2007 | 2008 | 2007 | 2008 | 2007 | 2008 | 2007 | 2008 |
| 8808                                 | North slope Jabal Sinjar | 21.8 |      | 68.5  |      | 24.8 |      | 7.3  |      | 27.5 |      | 374  |      | 1699 |      | 5309 |      | 5425 |      | 2347 |      |
| 8736                                 | South west of Rowanduz   | 20.3 | 20.4 | 70.2  | 56.3 | 18.5 | 39.0 | 9.2  | 5.5  | 32.8 | 30.7 | 358  | 359  | 1847 | 1732 | 5917 | 5401 | 6122 | 6267 | 2044 | 2138 |
| 8357                                 | Sulaymaniyah             | 20.6 |      | 79.2  |      | 23.5 |      | 11.5 |      | 33.8 |      | 387  |      | 1712 |      | 5031 |      | 5497 |      | 2173 |      |
| Israeli wild emmer wheat populations |                          |      |      |       |      |      |      |      |      |      |      |      |      |      |      |      |      |      |      |      |      |
| 10-8                                 | Ammiad                   | 21.1 | 23.0 | 78.7  | 67.7 | 22.0 | 55.3 | 10.0 | 5.3  | 28.0 | 32.0 | 391  | 371  | 1729 | 1714 | 4987 | 4503 | 5101 | 5485 | 2339 | 2552 |
| 10-9                                 |                          | 22.8 | 25.9 | 84.7  | 61.6 | 21.7 | 63.0 | 8.6  | 4.8  | 32.6 | 49.4 | 564  | 563  | 1923 | 1902 | 5297 | 5053 | 5864 | 6415 | 2593 | 2877 |
| 10-22                                |                          | 23.7 | 25.4 | 89.8  | 69.2 | 24.2 | 50.5 | 8.4  | 4.8  | 34.0 | 39.0 | 411  | 400  | 1964 | 1974 | 5454 | 5113 | 5972 | 6298 | 2466 | 2604 |
| 10-24                                |                          | 22.0 | 25.4 | 81.5  | 57.8 | 22.3 | 66.6 | 10.6 | 6.1  | 34.2 | 41.4 | 413  | 464  | 2000 | 1917 | 5561 | 5121 | 5790 | 6138 | 2354 | 2664 |
| 10-209                               |                          | 21.5 | 22.7 | 90.1  | 58.2 | 26.6 | 55.5 | 8.4  | 5.0  | 35.4 | 33.5 | 488  | 491  | 1991 | 2004 | 6245 | 5527 | 6170 | 6466 | 2497 | 2641 |
| 28-6                                 | Beit Oren                | 23.1 | 23.5 | 73.6  | 53.0 | 18.3 | 52.7 | 10.9 | 4.0  | 42.0 | 39.0 | 307  | 363  | 2012 | 1825 | 5307 | 4889 | 5948 | 5851 | 2218 | 2373 |
| 28-15                                |                          | 22.7 | 23.5 | 69.4  | 58.0 | 19.5 | 58.7 | 8.7  | 4.5  | 42.8 | 44.3 | 400  | 361  | 1853 | 1880 | 5217 | 4956 | 5384 | 6104 | 2060 | 2351 |
| 28-33                                |                          | 22.2 | 23.4 | 68.4  | 56.7 | 19.8 | 50.7 | 9.9  | 4.1  | 45.2 | 44.3 | 358  | 319  | 1958 | 1864 | 5407 | 4851 | 5918 | 6095 | 2140 | 2358 |
| 28-49                                |                          | 23.1 | 23.1 | 75.7  | 62.3 | 19.0 | 39.5 | 10.4 | 4.3  | 42.2 | 37.3 | 359  | 332  | 1893 | 1836 | 5140 | 4594 | 5806 | 6016 | 2095 | 2257 |
| 28-53                                |                          | 23.7 | 24.0 | 71.9  | 60.0 | 18.0 | 40.0 | 9.3  | 4.2  | 48.3 | 37.5 | 363  | 322  | 2003 | 1814 | 5299 | 4787 | 5956 | 6020 | 2182 | 2249 |
| 33-2                                 | Givat Koach              |      | 23.7 |       | 79.8 |      | 60.8 |      | 6.5  |      | 39.3 |      | 314  |      | 1786 |      | 4324 |      | 5779 |      | 2530 |
| 33-8                                 |                          | 25.5 | 26.9 | 77.9  | 64.5 | 31.0 | 53.0 | 9.8  | 5.3  | 47.6 | 37.0 | 629  | 409  | 2214 | 2199 | 5961 | 5100 | 6505 | 6722 | 2785 | 2791 |
| 33-39                                |                          | 25.7 | 26.9 | 94.7  | 65.0 | 32.1 | 55.0 | 10.8 | 5.2  | 48.1 | 42.3 | 482  | 422  | 2171 | 2134 | 5392 | 5049 | 6313 | 6515 | 2743 | 2720 |
| 33-48                                |                          | 24.2 | 26.2 | 90.7  | 56.0 | 35.4 | 52.7 | 9.5  | 4.6  | 47.1 | 40.8 | 452  | 418  | 2107 | 2131 | 5434 | 4982 | 6171 | 6546 | 2657 | 2744 |
| 33-58                                |                          | 23.1 | 22.9 | 78.8  | 59.7 | 18.3 | 45.3 | 11.2 | 4.2  | 46.2 | 40.3 | 351  | 351  | 2000 | 1758 | 5364 | 4766 | 5990 | 5952 | 2386 | 2277 |
| KH 4/1                               | Kokhav Hayarden          | 25.4 | 25.8 | 112.6 | 62.5 | 39.2 | 69.8 | 10.5 | 5.9  | 38.5 | 33.2 | 326  | 316  | 2045 | 1953 | 5459 | 5168 | 6214 | 6194 | 2701 | 2564 |
| KH 4/2                               |                          | 24.4 | 26.2 | 94.4  | 61.0 | 34.0 | 63.3 | 9.1  | 5.4  | 33.2 | 34.0 | 358  | 336  | 2032 | 2004 | 5546 | 5140 | 6068 | 6410 | 2648 | 2705 |
| KH 5/1                               |                          | 23.9 | 25.8 | 72.7  | 59.3 | 25.3 | 58.0 | 9.7  | 5.4  | 38.6 | 57.2 | 300  | 272  | 1926 | 1779 | 5433 | 4794 | 5690 | 5863 | 2353 | 2450 |
| KH 5/3                               |                          | 20.8 | 25.2 | 80.3  | 64.3 | 39.2 | 65.0 | 9.1  | 5.6  | 54.8 | 50.3 | 410  | 384  | 1752 | 1808 | 5066 | 4891 | 5742 | 6130 | 1987 | 2395 |
| P 2/3                                |                          | 21.8 | 24.3 | 62.0  | 43.6 | 21.4 | 59.0 | 9.3  | 5.0  | 36.2 | 42.4 | 295  | 315  | 1888 | 1962 | 5518 | 5476 | 5609 | 6271 | 2215 | 2533 |
| 16-28                                | Mt. Gilbboa              | 22.0 |      | 76.8  |      | 33.8 |      | 11.9 |      | 30.2 |      | 458  |      | 1918 |      | 5805 |      | 6168 |      | 2340 |      |
| 16-34                                |                          | 23.8 | 26.4 | 78.5  | 50.0 | 33.4 | 57.5 | 9.7  | 5.4  | 39.7 | 27.5 | 426  | 449  | 1944 | 2012 | 6110 | 5389 | 5923 | 6382 | 2201 | 2387 |
| 16-40                                |                          | 23.5 | 26.0 | 81.0  | 47.0 | 29.4 | 51.5 | 11.6 | 5.5  | 39.1 | 28.5 | 396  | 424  | 2001 | 1977 | 5539 | 4915 | 6094 | 6382 | 2309 | 2420 |
| 16-51                                |                          | 23.2 | 24.0 | 82.9  | 48.6 | 29.2 | 51.8 | 9.9  | 4.7  | 43.8 | 36.0 | 400  | 369  | 1936 | 1923 | 5638 | 5297 | 5728 | 6072 | 2276 | 2293 |
| 1-22                                 | Mt. Hermon               | 22.7 | 22.0 | 83.8  | 49.5 | 25.3 | 48.0 | 7.2  | 4.1  | 37.9 | 43.8 | 338  | 365  | 1806 | 1739 | 5560 | 5508 | 6086 | 6378 | 2285 | 2365 |
| 1-24                                 |                          | 22.1 |      | 86.0  |      | 27.6 |      | 7.3  |      | 43.1 |      | 406  |      | 1885 |      | 5495 |      | 6362 |      | 2526 |      |

| Genotype and collection site |                       | GPC  |      | Zn    |      | Fe   |       | Cu   |      | Mn   |      | Ca   |      | Mg   |      | K    |      | P    |      | S    |      |
|------------------------------|-----------------------|------|------|-------|------|------|-------|------|------|------|------|------|------|------|------|------|------|------|------|------|------|
|                              |                       | 2007 | 2008 | 2007  | 2008 | 2007 | 2008  | 2007 | 2008 | 2007 | 2008 | 2007 | 2008 | 2007 | 2008 | 2007 | 2008 | 2007 | 2008 | 2007 | 2008 |
| 1-42                         |                       | 23.6 | 22.0 | 79.4  | 56.6 | 24.1 | 43.6  | 7.8  | 4.3  | 36.4 | 40.2 | 362  | 372  | 1912 | 1738 | 5521 | 5457 | 6418 | 6453 | 2520 | 2451 |
| 1-59                         |                       | 21.0 | 19.4 | 61.9  | 47.6 | 16.4 | 37.0  | 8.9  | 4.2  | 25.2 | 24.0 | 502  | 486  | 2007 | 1700 | 5109 | 4576 | 5822 | 5386 | 2601 | 2261 |
| 1-64                         |                       |      | 27.5 |       | 59.7 |      | 67.0  |      | 4.8  |      |      | 48.2 |      | 346  |      | 1807 |      | 4730 |      | 6062 | 2580 |
| 1-67                         |                       |      | 23.7 |       | 50.0 |      | 46.3  |      | 4.3  |      |      | 40.7 |      | 385  |      | 1788 |      | 5399 |      | 6545 | 2416 |
| MM 5/2                       | Lower Ma'ale Merav    | 23.8 | 26.6 | 86.9  | 51.8 | 37.6 | 61.8  | 9.2  | 3.8  | 41.7 | 40.0 | 395  | 434  | 2079 | 2037 | 5410 | 4903 | 5871 | 6248 | 2364 | 2536 |
| MM 5/3                       |                       |      | 20.8 |       | 48.0 |      | 54.25 |      | 4.1  |      |      | 43.8 |      | 393  |      | 1704 |      | 4467 |      | 5693 | 2080 |
| MM 5/4                       |                       | 24.2 | 27.2 | 93.9  | 59.8 | 39.7 | 56.8  | 10.4 | 3.9  | 48.4 | 36.4 | 434  | 411  | 2048 | 2003 | 5925 | 4854 | 5828 | 6135 | 2376 | 2393 |
| MM 1/1                       | Upper Ma'ale Merav    | 24.8 | 26.5 | 101.6 | 68.5 | 38.3 | 59.5  | 9.4  | 4.9  | 51.8 | 47.0 | 494  | 521  | 2065 | 2065 | 5929 | 5873 | 6541 | 6492 | 2647 | 2670 |
| MM 1/2                       |                       |      | 27.3 |       | 65.4 |      | 62.2  |      | 5.0  |      |      | 45.0 |      | 477  |      | 2107 |      | 5253 |      | 6681 | 2553 |
| MM 1/3                       |                       | 22.7 | 23.4 | 75.3  | 57.0 | 23.0 | 43.0  | 8.3  | 4.1  | 31.6 | 29.7 | 395  | 385  | 1849 | 1808 | 5124 | 4851 | 5568 | 5881 | 2260 | 2425 |
| MM 2/1                       |                       |      | 23.6 |       | 62.8 |      | 59.8  |      | 5.1  |      |      | 42.8 |      | 436  |      | 1958 |      | 5051 |      | 6377 | 2447 |
| MM 2/2                       |                       |      | 24.9 |       | 67.0 |      | 54.5  |      | 4.4  |      |      | 44.5 |      | 3845 |      | 1986 |      | 5090 |      | 6377 | 2505 |
| 9-29                         | Rosh Pinna            | 21.8 | 21.7 | 69.6  | 45.6 | 26.9 | 42.8  | 7.3  | 3.7  | 48.6 | 34.6 | 353  | 360  | 1932 | 1784 | 5352 | 4905 | 5470 | 5557 | 2165 | 2125 |
| 9-33                         |                       | 21.9 | 21.8 | 75.2  | 48.3 | 24.0 | 45.0  | 8.3  | 4.0  | 38.9 | 39.3 | 372  | 356  | 1948 | 1848 | 5242 | 5080 | 5569 | 5736 | 2246 | 2247 |
| 9-45                         |                       | 21.1 | 22.6 | 78.9  | 51.5 | 27.6 | 48.3  | 8.5  | 4.3  | 45.6 | 40.0 | 401  | 394  | 1875 | 1812 | 5332 | 4994 | 5578 | 5626 | 2231 | 2224 |
| 9-58                         |                       | 23.8 | 27.1 | 102.1 | 90.6 | 26.4 | 64.4  | 11.3 | 7.4  | 49.5 | 60.6 | 556  | 475  | 2020 | 2028 | 5531 | 4756 | 6075 | 6507 | 2433 | 2845 |
| 9-72                         |                       | 24.3 | 21.6 | 89.3  | 46.8 | 29.7 | 46.0  | 11.1 | 5.2  | 45.2 | 37.5 | 478  | 369  | 1979 | 1708 | 5548 | 5140 | 6117 | 5851 | 2537 | 2442 |
| 13-B-53                      | Tabigha (Basalt)      | 22.3 | 24.9 | 83.0  | 70.8 | 22.1 | 45.5  | 11.5 | 6.2  | 44.5 | 39.8 | 390  | 359  | 1861 | 1861 | 5603 | 4742 | 5592 | 6082 | 2168 | 2399 |
| 13-B-78                      |                       | 22.2 | 23.9 | 83.6  | 64.5 | 21.6 | 47.0  | 13.1 | 6.2  | 45.9 | 49.3 | 434  | 342  | 1886 | 1838 | 5665 | 4969 | 5748 | 5810 | 2087 | 2291 |
| 13-B-87                      |                       | 22.2 | 23.3 | 81.9  | 58.8 | 22.5 | 54.5  | 10.5 | 5.3  | 40.0 | 36.3 | 350  | 365  | 1820 | 1919 | 5314 | 5332 | 5461 | 6272 | 2187 | 2384 |
| 13-B-89                      |                       | 21.6 | 23.1 | 95.3  | 58.2 | 28.7 | 60.0  | 10.8 | 5.3  | 50.3 | 47.3 | 387  | 349  | 1776 | 1728 | 5310 | 4567 | 5513 | 5861 | 2149 | 2240 |
| 15-T-6                       | Tabigha (Terra rossa) | 24.6 |      | 92.0  |      | 30.9 |       | 10.0 |      | 49.2 |      | 362  |      | 1950 |      | 5616 |      | 5960 |      | 2307 |      |
| 15-T-25                      |                       | 23.1 | 25.2 | 110.1 | 75.3 | 37.7 | 61.0  | 9.7  | 4.7  | 40.3 | 42.3 | 538  | 494  | 1980 | 1951 | 6339 | 5711 | 6590 | 6820 | 2483 | 2499 |
| 15-T-28                      |                       | 23.5 | 24.1 | 95.6  | 78.0 | 23.5 | 53.6  | 10.9 | 6.6  | 42.9 | 40.2 | 425  | 398  | 1903 | 1868 | 5161 | 4941 | 5678 | 5870 | 2403 | 2568 |
| 15-T-33                      |                       | 23.1 | 26.3 | 90.9  | 58.2 | 25.5 | 56.4  | 11.4 | 5.6  | 40.8 | 40.0 | 418  | 403  | 1726 | 1731 | 4658 | 4278 | 5178 | 5465 | 2179 | 2334 |
| 15-T-36                      |                       | 23.4 | 23.3 | 85.3  | 60.8 | 23.9 | 48.5  | 10.5 | 5.6  | 44.7 | 38.0 | 428  | 373  | 1725 | 1736 | 4986 | 4399 | 5157 | 5400 | 2093 | 2261 |
| 12-2                         | Yehudiyya             | 23.8 | 25.6 | 72.5  | 63.5 | 22.0 | 63.3  | 10.2 | 5.5  | 53.9 | 58.5 | 342  | 307  | 1855 | 1781 | 5178 | 4682 | 5468 | 5928 | 2122 | 2363 |
| 12-3                         |                       | 25.3 | 27.0 | 79.1  | 70.2 | 26.7 | 61.7  | 10.5 | 5.6  | 58.4 | 54.2 | 285  | 317  | 1866 | 1757 | 5179 | 4690 | 5642 | 5853 | 2224 | 2353 |
| 12-4                         |                       | 24.6 | 25.5 | 80.4  | 72.6 | 22.6 | 60.0  | 10.4 | 6.1  | 58.0 | 59.2 | 346  | 302  | 1845 | 1755 | 5243 | 4539 | 5491 | 5783 | 2177 | 2416 |
| 12-73                        |                       | 23.6 | 24.0 | 86.0  | 64.6 | 20.9 | 55.4  | 12.4 | 5.7  | 53.1 | 40.0 | 476  | 372  | 1919 | 1732 | 5520 | 4494 | 5606 | 5633 | 2691 | 2453 |

| Genotype and collection site |        | GPC  |      | Zn   |      | Fe   |      | Cu   |      | Mn   |      | Ca   |      | Mg   |      | K    |      | P    |      | S    |      |
|------------------------------|--------|------|------|------|------|------|------|------|------|------|------|------|------|------|------|------|------|------|------|------|------|
|                              |        | 2007 | 2008 | 2007 | 2008 | 2007 | 2008 | 2007 | 2008 | 2007 | 2008 | 2007 | 2008 | 2007 | 2008 | 2007 | 2008 | 2007 | 2008 | 2007 | 2008 |
| Domesticated wheat           |        |      |      |      |      |      |      |      |      |      |      |      |      |      |      |      |      |      |      |      |      |
| Durum wheat                  |        |      |      |      |      |      |      |      |      |      |      |      |      |      |      |      |      |      |      |      |      |
| 580D                         | Israel | 13.5 |      | 50.8 |      | 14.5 |      | 7.5  |      | 22.0 |      | 274  |      | 1418 |      | 4797 |      | 4285 |      | 1396 |      |
| Inbar                        | Israel | 11.6 | 11.6 | 47.1 | 32.7 | 15.5 | 25.2 | 8.1  | 4.1  | 27.9 | 20.5 | 273  | 333  | 1329 | 1241 | 5060 | 5104 | 4098 | 4499 | 1260 | 1275 |
| Svevo                        | Italy  | 12.7 | 13.2 | 44.9 | 30.7 | 14.1 | 27.3 | 6.2  | 3.2  | 25.1 | 22.7 | 327  | 415  | 1367 | 1207 | 4828 | 4602 | 4109 | 4111 | 1316 | 1363 |
| Kizilitan                    | Turkey | 12.2 | 12.0 | 55.6 | 33.7 | 14.1 | 30.3 | 6.9  | 3.8  | 24.4 | 21.2 | 357  | 384  | 1365 | 1139 | 5123 | 4612 | 4238 | 4028 | 1377 | 1306 |
| Sarica k 98                  | Turkey | 11.5 | 12.3 | 46.5 | 31.7 | 17.9 | 26.8 | 7.0  | 3.6  | 31.1 | 19.5 | 326  | 403  | 1277 | 1198 | 4763 | 4731 | 3975 | 4421 | 1178 | 1336 |
| Kofa                         | USA    | 12.0 |      | 47.1 |      | 15.3 |      | 7.0  |      | 25.8 |      | 332  |      | 1319 |      | 5449 |      | 4061 |      | 1295 |      |
| Langdon                      | USA    | 13.8 | 13.0 | 54.1 | 45.3 | 17.0 | 30.0 | 7.4  | 5.0  | 32.2 | 24.7 | 364  | 417  | 1434 | 1343 | 4237 | 4045 | 4324 | 4383 | 1512 | 1452 |
| Bread wheat                  |        |      |      |      |      |      |      |      |      |      |      |      |      |      |      |      |      |      |      |      |      |
| Beit Lechem                  | Israel | 12.1 |      | 45.9 |      | 19.7 |      | 7.3  |      | 27.4 |      | 462  |      | 1403 |      | 4802 |      | 4216 |      | 1351 |      |
| Galil                        | Israel | 11.9 |      | 49.3 |      | 17.2 |      | 5.6  |      | 26.2 |      | 334  |      | 1330 |      | 4007 |      | 3594 |      | 1220 |      |
| Gedera                       | Israel | 12.0 | 13.2 | 48.2 | 30.2 | 19.8 | 27.5 | 6.3  | 3.4  | 26.5 | 21.3 | 376  | 357  | 1452 | 1316 | 4612 | 4511 | 3870 | 3873 | 1318 | 1388 |
| Nirit                        | Israel | 13.3 |      | 53.1 |      | 18.9 |      | 6.9  |      | 35.0 |      | 336  |      | 1558 |      | 4292 |      | 4219 |      | 1401 |      |
| Rotem                        | Israel | 10.2 |      | 40.2 |      | 19.5 |      | 5.8  |      | 26.1 |      | 312  |      | 1340 |      | 4455 |      | 3457 |      | 1180 |      |
| Zahir                        | Israel | 10.5 | 12.1 | 37.4 | 28.7 | 18.9 | 29.0 | 5.1  | 3.1  | 26.6 | 27.5 | 321  | 386  | 1329 | 1265 | 4381 | 4299 | 3794 | 4051 | 1270 | 1322 |
| Ruta                         | Israel | 11.9 |      | 45.5 |      | 18.3 |      | 6.1  |      | 33.0 |      | 354  |      | 1405 |      | 4179 |      | 3794 |      | 1291 |      |
| Ada -99                      | Turkey | 10.6 | 12.3 | 42.9 | 35.0 | 21.0 | 28.0 | 6.1  | 3.8  | 30.3 | 30.7 | 344  | 359  | 1268 | 1287 | 4657 | 4226 | 3610 | 4043 | 1151 | 1362 |
| Gerek-79                     | Turkey | 11.4 | 13.0 | 44.6 | 28.3 | 19.4 | 31.5 | 5.4  | 3.0  | 26.0 | 27.5 | 355  | 425  | 1467 | 1340 | 4836 | 4406 | 4108 | 4171 | 1271 | 1346 |
| UC 1113                      | USA    | 12.3 |      | 45.4 |      | 13.0 |      | 5.5  |      | 19.8 |      | 267  |      | 1219 |      | 4757 |      | 4020 |      | 1212 |      |

TABLE S2. Soil characteristics of 12 wild emmer wheat populations collection sites in Israel. Symbol of variable: Ln = longitude; Lt = latitude; NH<sub>4</sub> = ammonium (mg kg<sup>-1</sup>); NO<sub>3</sub> = nitrate (mg l<sup>-1</sup>), Zn = zinc (mg kg<sup>-1</sup>); Fe = iron (mg kg<sup>-1</sup>); Cu = copper (mg kg<sup>-1</sup>); Mn = manganese (mg kg<sup>-1</sup>); Ca+Mg = calcium and magnesium (meq<sup>-1</sup>); K = phosphorus (mg kg<sup>-1</sup>); P = potassium (mg kg<sup>-1</sup>); Cl = chloride (meq<sup>-1</sup>); Clay = percentage of clay (%), Silt = percentage of silt (%); Sand = percentage of sand (%); CaCO<sub>3</sub> = percentage of calcium carbonate (%); EC = electrical conductivity (ds m<sup>-1</sup>).

| Population            | Ln    | Lt    | NH <sub>4</sub> | NO <sub>3</sub> | Zn  | Fe   | Cu  | Mn    | Ca+Mg | K    | P    | Cl   | Clay | Silt | Sand | CaCO <sub>3</sub> | EC   | pH   |
|-----------------------|-------|-------|-----------------|-----------------|-----|------|-----|-------|-------|------|------|------|------|------|------|-------------------|------|------|
| Ammiad                | 35°31 | 32°55 | 6.0             | 2.5             | 1.4 | 15.5 | 3.4 | 16.1  | 2.9   | 0.09 | 18.4 | 0.73 | 62.2 | 25.2 | 12.6 | 5.6               | 0.39 | 7.17 |
| Beit Oren             | 35°00 | 32°43 | 8.6             | 4.2             | 0.6 | 10.8 | 2.7 | 26.2  | 3.2   | 0.06 | 7.6  | 0.70 | 68.0 | 23.4 | 8.6  | 2.7               | 0.37 | 7.07 |
| Givat Koach           | 34°57 | 32°02 | 8.2             | 5.2             | 1.0 | 10.9 | 2.7 | 11.8  | 3.5   | 0.07 | 7.0  | 0.83 | 50.7 | 40.7 | 8.6  | 4.0               | 0.40 | 7.37 |
| Kokhav Hayarden       | 35°29 | 32°27 | 14.7            | 6.9             | 0.9 | 9.4  | 4.7 | 7.4   | 3.9   | 0.21 | 8.7  | 0.70 | 59.3 | 23.7 | 16.9 | 7.3               | 0.44 | 7.53 |
| Mt. Gilbboa           | 35°24 | 32°30 | 32.1            | 6.1             | 1.7 | 17.6 | 2.3 | 87.1  | 7.0   | 0.15 | 7.7  | 1.03 | 55.5 | 34.5 | 9.9  | 3.7               | 0.72 | 7.00 |
| Mt. Hermon            | 35°45 | 33°17 | 10.8            | 10.3            | 1.8 | 19.2 | 1.6 | 47.0  | 4.0   | 0.08 | 25.9 | 0.90 | 64.0 | 30.1 | 5.9  | 5.1               | 0.45 | 6.97 |
| Lower Ma'ale Merav    | 35°26 | 32°25 | 17.4            | 11.7            | 1.4 | 18.4 | 2.2 | 27.1  | 4.5   | 0.08 | 5.3  | 0.57 | 54.2 | 33.2 | 12.6 | 3.1               | 0.51 | 7.40 |
| Upper Ma'ale Merav    | 35°26 | 32°26 | 22.5            | 9.5             | 1.1 | 11.5 | 1.4 | 32.5  | 5.6   | 0.13 | 5.6  | 0.67 | 58.2 | 33.2 | 8.6  | 3.7               | 0.57 | 7.33 |
| Rosh Pinna            | 35°30 | 32°58 | 11.9            | 6.6             | 2.2 | 16.4 | 2.9 | 22.7  | 2.7   | 0.04 | 17.3 | 0.67 | 70.7 | 23.4 | 5.9  | 3.7               | 0.33 | 6.93 |
| Tabigha (Baslet)      | 35°32 | 32°53 | 6.5             | 4.7             | 0.5 | 9.4  | 2.3 | 10.5  | 3.1   | 0.06 | 8.5  | 0.73 | 58.7 | 28.7 | 12.6 | 13.8              | 0.40 | 7.47 |
| Tabigha (Terra rossa) | 35°32 | 32°53 | 14.5            | 3.9             | 0.5 | 10.9 | 2.4 | 13.2  | 3.1   | 0.05 | 7.5  | 0.73 | 60.0 | 31.4 | 8.6  | 9.1               | 0.37 | 7.47 |
| Yehudiya              | 35°41 | 32°55 | 17.0            | 2.5             | 1.2 | 30.2 | 3.0 | 103.8 | 5.3   | 0.08 | 12.1 | 0.70 | 56.9 | 37.2 | 5.9  | 4.8               | 0.56 | 6.63 |
